# Supplementary material
Source: publisher figshare collection journal article supplement (https://tandf.figshare.com/ndownloader/files/21653994)
Supplement: Supplementary file 1 [file 21653994]

Supplemental File:

|                                                            | <b>Current<br/>smoker<br/><i>n</i> = 631</b> | <b>Former<br/>smoker<br/><i>n</i> = 630</b> | <b><i>p</i> value*</b> |
|------------------------------------------------------------|----------------------------------------------|---------------------------------------------|------------------------|
| Cohabits with other smokers, <b><i>n</i></b> (%)           | 205 (32.5)                                   | 132 (21.0)                                  | <0.0001                |
| Smoking status of immediate family, <b><i>n</i></b><br>(%) |                                              |                                             | <0.0001                |
| All smokers                                                | 46 (7.3)                                     | 21 (3.3)                                    |                        |
| Mainly smokers                                             | 53 (8.4)                                     | 23 (3.7)                                    |                        |
| Half smokers, half non-smokers                             | 121 (19.2)                                   | 66 (10.5)                                   |                        |
| Mainly non-smokers                                         | 152 (24.1)                                   | 180 (28.6)                                  |                        |
| All non-smokers                                            | 215 (34.1)                                   | 304 (48.3)                                  |                        |
| Smoking status of colleagues, <b><i>n</i></b> (%)          |                                              |                                             | <0.0001                |
| All smokers                                                | 9 (1.4)                                      | 8 (1.3)                                     |                        |
| Mainly smokers                                             | 91 (14.4)                                    | 37 (5.9)                                    |                        |
| Half smokers, half non-smokers                             | 228 (36.1)                                   | 142 (22.5)                                  |                        |
| Mainly non-smokers                                         | 144 (22.8)                                   | 177 (28.1)                                  |                        |
| All non-smokers                                            | 39 (6.2)                                     | 121 (19.2)                                  |                        |
| Smoking status of friends, <b><i>n</i></b> (%)             |                                              |                                             | p<0.0001               |
| All smokers                                                | 7 (1.1)                                      | 6 (1.0)                                     |                        |
| Mainly smokers                                             | 109 (17.3)                                   | 32 (5.1)                                    |                        |
| Half smokers, half non-smokers                             | 257 (40.7)                                   | 144 (22.9)                                  |                        |
| Mainly non-smokers                                         | 175 (27.7)                                   | 253 (40.2)                                  |                        |
| All non-smokers                                            | 16 (2.5)                                     | 121 (19.2)                                  |                        |

\* The *p* value is derived from the comparison between CS and FS, using the Wilcoxon rank-sum tests.

NS, not statically significant.
